# Supplementary material for: Wnt3a signal pathways activate MyoD expression by targeting cis-elements inside and outside its distal enhancer
Source: Oxford University Press journal article supplement (doi:10.1042/bsr20140177), 2015-02-05
Supplement: bsr035e180ntsadd.pdf [file bsr035e180ntsadd.pdf]

## Supplementary legends

### **FIGURE S1**: LiCl activates MyoD-PE-L-luc dose-dependently.

C2C12-MyoD-PE-L-luc stable clones were treated with Wnt3a or LiCl (10 mM) and their luciferase activity was determined 48 hr after treatment (A). Their response to increasing amount (2, 5, and 10 mM) of LiCl was also determined (B). \*\*:  $p < 0.01$  vs. vehicle control.

### **FIGURE S2** Pax7 protein levels in C2C12 cells.

The levels of Pax7 protein in total lysate (50  $\mu$ g) from C2C12 cells of CMB and MT stages were examined with Western blot using antibodies against Pax7 and Gapdh. Numbers to the left represent molecular weight in kilodalton (Kd).

(A)

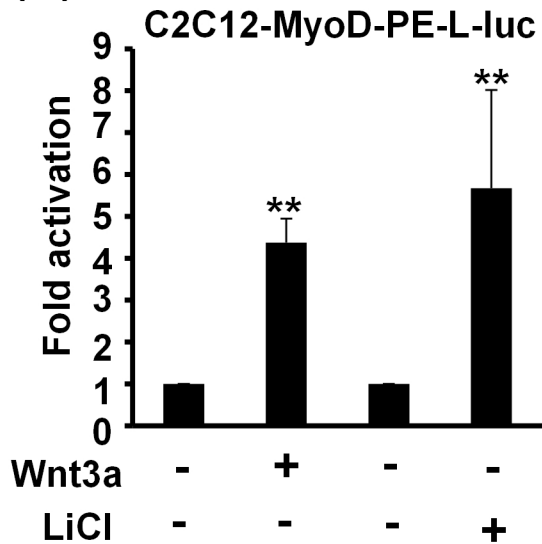

(B)

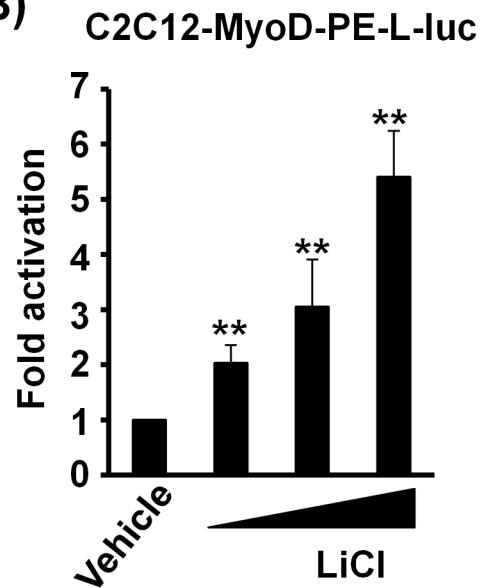

FIGURE S2

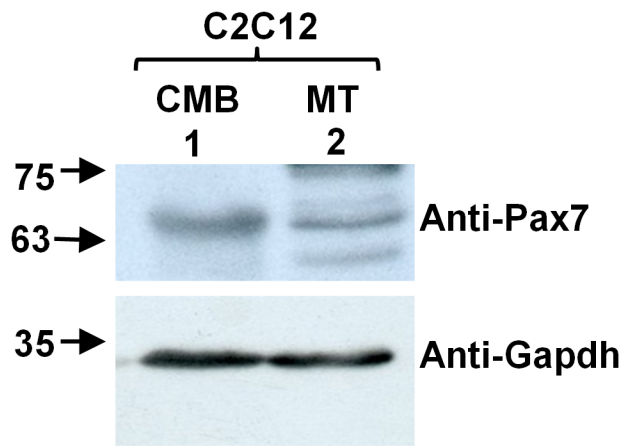

**Table S1: Primer sets used for cloning.**

| NCU code         | Clone name        | Primer Sequence*                                                                                                           | Amplicon size (bp) |
|------------------|-------------------|----------------------------------------------------------------------------------------------------------------------------|--------------------|
| 026022<br>026023 | <i>DE</i>         | FP : 5'- <b>cggaattc</b> gtgttgcccagttatcccag-3'<br>RP : 5'- <b>cggaattc</b> gctggctgggtctctctagtagtac-3'                  | 4497               |
| 021003<br>021004 | <i>P6P</i>        | FP : 5'- <b>ggggtacc</b> ccagtagaggcaaagaaaggaa-3'<br>RP : 5'- <b>ctagctag</b> ctaggtgggttggaatgcacac-3'                   | 2965               |
| 026022<br>039005 | <i>DE-#1</i>      | FP : 5'- <b>cggaattc</b> gtgttgcccagttatcccag-3'<br>RP : 5'- <b>cggaattc</b> cgctgcctgcctcaggcct-3'                        | 1776               |
| 039004<br>039010 | <i>DE-#2</i>      | FP : 5'- <b>cggaattc</b> gctcttcacctcttc-3'<br>RP : 5'- <b>cggaattc</b> gcatgctcactctggc-3'                                | 1489               |
| 039002<br>039003 | <i>DE-#3</i>      | FP : 5'- <b>cggaattc</b> gccaggcccttccttct-3'<br>RP : 5'- <b>cggaattc</b> gagtgacagagacggcc-3'                             | 1491               |
| 039011<br>026023 | <i>DE-#4</i>      | FP : 5'- <b>cggaattc</b> gagcccaggggtacatgaa-3'<br>RP : 5'- <b>cggaattc</b> gctggctgggtctctagtagtac-3'                     | 1215               |
| 026022<br>039010 | <i>DE-#5</i>      | FP : 5'- <b>cggaattc</b> gtgttgcccagttatcccag-3'<br>RP : 5'- <b>cggaattc</b> gcatgctcactctggc-3'                           | 2581               |
| 026022<br>039003 | <i>DE-#6</i>      | FP : 5'- <b>cggaattc</b> gtgttgcccagttatcccag-3'<br>RP : 5'- <b>cggaattc</b> gagtgacagagacggcc-3'                          | 3269               |
| 039002<br>026023 | <i>DE-#7</i>      | FP : 5'- <b>cggaattc</b> gccaggcccttccttct-3'<br>RP : 5'- <b>cggaattc</b> gctggctgggtctctagtagtac-3'                       | 2712               |
| 039004<br>039003 | <i>DE-#8</i>      | FP : 5'- <b>cggaattc</b> gctcttcacctcttc-3'<br>RP : 5'- <b>cggaattc</b> gagtgacagagacggcc-3'                               | 2177               |
| 039004<br>026023 | <i>DE-#9</i>      | FP : 5'- <b>cggaattc</b> gctcttcacctcttc-3'<br>RP : 5'- <b>cggaattc</b> gctggctgggtctctagtagtac-3'                         | 3398               |
| 039004<br>039023 | <i>DE-#10</i>     | FP : 5'- <b>cggaattc</b> gctcttcacctcttc-3'<br>RP : 5'- <b>cggaattc</b> gctggtaccaggagg-3'                                 | 2922               |
| 33005<br>33006   | <i>A fragment</i> | FP : 5'- <b>cgacgcg</b> tcg tat gta agg cta atg aga tcc cgg -3'<br>RP : 5'- <b>cgacgcg</b> tcg ctg gct cag ggt ctg gga -3' | 1402               |
| 33026<br>33027   | <i>B fragment</i> | FP : 5'- <b>cgacgcg</b> t acttgcagccaagcagccct -3'<br>RP : 5'- <b>cgacgcg</b> t gcagccctgagatccc -3'                       | 1161               |

|                  |                       |                                                                                                                         |      |
|------------------|-----------------------|-------------------------------------------------------------------------------------------------------------------------|------|
| 33024<br>33025   | <i>C fragment</i>     | FP : 5'- <b>cgacgcgt</b> gggctcccagggtataa -3'<br>RP : 5'- <b>cgacgcgt</b> gaaggaaggaaggaggag -3'                       | 1381 |
| 33022<br>33023   | <i>D fragment</i>     | FP : 5'- <b>cgacgcgt</b> ctctcctgaacactac -3'<br>RP : 5'- <b>cgacgcgt</b> ctccgctcaccccccccc -3'                        | 1316 |
| 33020<br>33021   | <i>E fragment</i>     | FP : 5'- <b>cgacgcgt</b> caggacacaggcagggca -3'<br>RP : 5'- <b>cgacgcgt</b> acttaggaggtggaggt -3'                       | 1340 |
| 26027<br>26028   | <i>F fragment</i>     | FP : 5'- <b>cgacgcgtc</b> ccatcatatcatetaagcta -3'<br>RP : 5'- <b>cgacgcgtc</b> ccacaattcccagattctcttgc -3'             | 1116 |
| 33018<br>33019   | <i>G fragment</i>     | FP : 5'- <b>cgacgcgt</b> cctgectcctcttttccc -3'<br>RP : 5'- <b>cgacgcgt</b> ccattctgtcccattcc -3'                       | 1366 |
| 33016<br>33030   | <i>H fragment</i>     | FP : 5'- <b>cgacgcgt</b> gat get ccc aga ctc cca -3'<br>RP : 5'- <b>cgacgcgt</b> aactcaccatgtacc -3'                    | 1254 |
| 33014<br>33015   | <i>I fragment</i>     | FP : 5'- <b>cgacgcgt</b> ggg tac atg gtg agt gtc -3'<br>RP : 5'- <b>cgacgcgt</b> gtg ggt ggg gtg ggg tgg g -3'          | 1290 |
| 33011<br>33012   | <i>J fragment</i>     | FP : 5'- <b>cgacgcgt</b> cccaccccaccccacccac -3'<br>RP : 5'- <b>cgacgcgt</b> accctccaagtatccc -3'                       | 1240 |
| 033034<br>033043 | <i>K fragment</i>     | FP : 5'- <b>cgacgcgt</b> CCTCCTCTGTGCTGCCTTA-3'<br>RP : 5'- <b>cgacgcgt</b> GGTTTCCTTTCTAAGTGC-3'                       | 715  |
| 33007<br>33008   | <i>L fragment</i>     | FP : 5'- <b>cgacgcgt</b> gcaggcatgaaggacatg -3'<br>RP : 5'- <b>cgacgcgt</b> ggtgttagtcattctgggg -3'                     | 1510 |
| 33003<br>33004   | <i>M fragment</i>     | FP : 5'- <b>cgacgcgtcg</b> cct gcc ttt cac acc tga tg -3'<br>RP : 5'- <b>cgacgcgtcg</b> aca cat gtc tca tcc -3'         | 1174 |
| 33001<br>33002   | <i>N fragment</i>     | FP: 5'- <b>cgacgcgtc</b> ggt acc tga tgt gtg cct gg -3'<br>RP: 5'- <b>cgacgcgtcg</b> tat gct cta aat aaa atc tat tc -3' | 1142 |
| 039020<br>039021 | <i>β-Catenin-Δ90</i>  | FP: 5'- <b>cgcgatccatggctcagagggtcc</b> -3'<br>RP: 5'- <b>cgcgatcccaggtcagatcaaaccag</b> -3'                            | 2079 |
| 039026<br>039021 | <i>β-Catenin-Δ151</i> | FP: 5'- <b>cgcgatccatggcaattcctgagct</b> -3'<br>RP: 5'- <b>cgcgatcccaggtcagatcaaaccag</b> -3'                           | 1896 |

\*: linkers and restriction sites are shown in bold.

FP: forward primer

RP: reverse primer

**Table S2: Primer sets used for amplifying gene in RT-PCR**

| NCU code         | Gene name       | Primer Sequence                                                       | Amplicon size |
|------------------|-----------------|-----------------------------------------------------------------------|---------------|
| 00324<br>00325   | <i>MyoD</i>     | FP : 5'-ggctacgacaccgcctacta-3'<br>RP : 5'-gttctgtgtcgcttaggat-3'     | 204 bp        |
| 006012<br>006013 | <i>Myogenin</i> | FP : 5'-ccagtgaatgcaactcccacagc-3'<br>RP : 5'-agacatatcctccaccgtga-3' | 166 bp        |
| 001042<br>001043 | <i>Gapdh</i>    | FP : 5'-cctctggaaagctgtggcgt-3'<br>RP : 5'-ttggcaggtttctccaggcg-3'    | 190 bp        |
| 006001<br>006002 | <i>M36b4</i>    | FP : 5'-ggcagcattataaccctgaagtg-3'<br>RP : 5'-cggacaccctccagaaagc-3'  | 73 bp         |

**FP: forward primer**

**RP: reverse primer**

**Table S3: Primer sets used for amplifying genes in CHIP assay**

| NCU Code         | Name              | Primer sequence                                                                        | Amplicon size (bp) |
|------------------|-------------------|----------------------------------------------------------------------------------------|--------------------|
| 039047<br>039048 | <i>MyoD-P1</i>    | FP: 5'- ccc ctt ccc ctc acc at- 3'<br>RP: 5'- cgg tga gtc cct cca ag - 3'              | 102                |
| 039049<br>039050 | <i>MyoD-P2</i>    | FP: 5'- ctt ggt tgt gta tcc tgc t- 3'<br>RP: 5'- tca aat tcc tgt agc c - 3'            | 160                |
| 039051<br>039052 | <i>MyoD -P3</i>   | FP: 5'- tga gca agt gtt gcc cag tta t- 3'<br>RP: 5'- gac caa cct cct atg tct a- 3'     | 121                |
| 039041<br>039042 | <i>DKK1</i>       | FP: 5'- cca gcg ctt tga aat ccc at - 3'<br>RP: 5'- acc gcg gct gcc ttt ata cc- 3'      | 100                |
| 029124<br>029125 | <i>M-cadherin</i> | FP: 5'-ctc tcc egg gca gcc ctc tg-3'<br>RP: 5'-gcg cat gcg tcc tgc tcc cga t -3'       | 126                |
| 039024<br>039057 | <i>MyoD-L1</i>    | FP: 5'- cgg aat tcg cag gca tga agg aca tg - 3'<br>RP: 5'- tgg aca cct cac acg ctc- 3' | 187                |
| 039058<br>039059 | <i>Id3</i>        | FP: 5'- ccg ggc ata cat tta gtt cct - 3'<br>RP: 5'- tct ctc tct cct ctc tct ctc aa- 3' | 365                |

**FP: forward primer****RP: reverse primer**
